# Supplementary material for: Do mothers also “manipulate” grandparental care?
Source: PeerJ journal article supplement (doi:10.7717/peerj.5924), 2018-11-15
Supplement: Questionnare_.pdf [file Questionnare_.pdf]

1 Questionnaire study 1

2 The questionnaire deals with relationships and resemblance between grandparents and  
3 grandchildren. It is only applicable to people who have both a daughter and a son, where  
4 both have own biological children (people with grandchildren from both the son and the  
5 daughter). The results will be used in a bachelor thesis at the University of Tromsø.

6 The questionnaire is completely anonymous and consists of 35 questions. One has the right  
7 to opt out of responding to specific questions if desired.

8

9

10 1. Age:

11

12 2. Sex:

13  Female

14  Male

15

16 3. How many children do you have?

17 Girls:

Boys:

18

19 4. How old is the daughter who had children first?

20 5. How old is the son who had children first?

21

22 6. How many grandchildren have you gotten from your daughter?

23 Girls:

Boys:

24

25 7. How many grandchildren have you gotten from your son?

26 Girls: Boys:

27

28 8. What sex is your first grandchild from your daughter?

29 9. What sex is your first grandchild from your son?

30

31 10. How old is your first grandchild from your daughter?

32 11. How old is your first grandchild from your son?

33

34 12. How long does it take by bus or car to get to your daughter's child?

35 13. How long does it take by bus or car to get to your son's child?

36

37

38 14. How much does it cost to travel to your daughter's child?

39 15. How much does it cost to travel to your son's child?

40

41 16. How often do you meet your daughter's child?

42  Daily

43  Weekly

44  Monthly

45  Every six months

46  Yearly

47  Less often

48

49

50 17. How often do you meet your son's child?

51  Daily

52  Weekly

53  Monthly

54  Every six months

55  Yearly

56  Less often

57

58 18. Do you visit your daughter's child more often than he/she visits you?

59  I visit more often

60  The children visit more often

61  We visit each other an equal amount

62  Don't know

63

64 19. Do you visit your son's child more often than he/she visits you?

65  I visit more often

66  The children visit more often

67  We visit each other an equal amount

68  Don't know

69

70 20. Does your daughter live with the father of the child?

71  Yes

72  No

73

74 21. Does your son live with the mother of the child?

75  Yes

76  No

77

78

79 In the next part I will compare your grandchildren from your son and daughter, and their  
80 mental and physical resemblance to you on a scale from 1 to 7, where 1 represents the least  
81 similar, and 7 represents most similar.

82

83 Physical resemblance is defined as physical features such as face shape, body shape,  
84 posture, etc. Psychical/mental similarity is defined as similarity in behavior, thinking, talents,  
85 personality, etc.

86

87 22. On a scale from 1 to 7, how much do you feel your daughter's child resembles you  
88 physically?

89 1 2 3 4 5 6 7

90

91 23. On a scale from 1 to 7, how much do you feel your son's child resembles you  
92 physically?

93 1 2 3 4 5 6 7

94

95 24. On a scale from 1 to 7, how much do you feel your daughter's child resembles you  
96 psychologically?

97 1 2 3 4 5 6 7

98

99 25. On a scale from 1 to 7, how much do you feel your son's child resembles you

100 psychologically?

101 1 2 3 4 5 6 7

102

103

104 26. Which of the two grandchildren considered in this questionnaire do you feel

105 physically resembles you the most.

106  Your son's child

107  Your daughter's child

108

109 27. Which of the two grandchildren considered in this questionnaire do you feel

110 psychologically resembles you the most?

111  Your son's child

112  Your daughter's child

113

114 28. Have your grandchildren's resemblance to you ever been pointed out by someone in

115 your family?

116 Yes / No

117

118 29. If yes, who pointed it out?

119

120 30. What grandchild was mentioned?

121  Your son's child

122  Your daughter's child

123

124 31. Was your grandchild described as very similar or very different to you?

125

126

127

128 32. Has your son or daughter ever said that one of your grandchildren resembles you?

129  Both

130  Only son

131  Only daughter

132  Neither

133

134 33. If both have commented that one of the grandchildren resembles you, who have

135 most intensively and most frequently mentioned this?

136  Son

137  Daughter

138  Equal

139

140 34. Has your son or daughter ever said that one of your grandchildren is unlike you?

141  Both

142  Only son

143  Only daughter

144  Neither

145

146 35. If both have said that one of the grandchildren is unlike you, who have most  
147 intensively and most frequently mentioned this?

148  Son

149  Daughter

150  Equal

151

152

153

154

155

156 Thank you for taking the time to answer this questionnaire

157

158

159 Questionnaire study 2

160

161 All included respondents had to be a parent of a biological child or children and at least have  
162 one biological sibling of the opposite sex that also were a parent of a biological child or  
163 children.

164

165 What is your sex?

166

167 What is your age?

168

169 How many biological children do you have?

170 What is the sex and age of your first child?

171 What is the sex and age of your second child?

172 Continued

173

174 How many siblings do you have?

175

176 From oldest to youngest, which number are you among your siblings?

177 What is the sex and age of your, in age, closest sibling?

178 Does your closest sibling have children and, in case, how many?

179 What is the sex and age of your, in age, closest sibling?

180 Does your closest sibling have children and, in case, how many?

181 Continued

182



183 How often have your children contact with their maternal grandmother:

184 Daily or more often?

185 Approximately every other day?

186 Once or twice a week?

187 On a weekly basis?

188 On a monthly basis?

189 On an annual basis?

190 Rarer than annual?

191 Not at all (dead)?

192 Continued for maternal grandfather, paternal grandmother and  
193 paternal grandfather.

194

195 Resemblance (read to the respondent): It is well known that “resemblance” can be  
196 interpreted in many ways. Some emphasize external traits like eye-color, hair-color, way of  
197 walking, and body-shape, while others emphasize humor, interests, gestures and temper,  
198 that is, internal traits, when evaluating resemblance. These two ways of evaluation is of  
199 equal value. When you evaluate resemblance, do you mainly emphasize internal or external  
200 traits?

201 Four alternative answers: (i) external traits, (ii) internal traits, (iii) equal amount of  
202 emphasis on external and internal traits, and (vi) uncertain (under the interview the  
203 latter answer was not given as an alternative, but still used).

204

205 Which of your siblings do you resemble the most?

206

207 Which of your siblings do you resemble the least?

208

209 Which of your nieces, nephew do you resemble the most?

210

211 Which of your nieces, nephew do you resemble the least?

212

213 Do you resemble your child (children) more or less than your closest, in age, sibling

214 resemble hers/his child (children)?

215

216 Do you resemble your child (children) more or less than your next closes, in age, tsibling

217 resemble hers/his child (children)?

218 Continued for all siblings

219

220 Who resemble your mother the most, your child (children) or your closest, in age, sibling's

221 child (children)?

222 Who resemble your mother the most, your child (children) or your next closest sibling's

223 child (children)?

224 Continued for all siblings

225

226 Who resemble your father the most, your child (children) or your closest sibling's child

227 (children)?

228 Who resemble your father the most, your child (children) or your next closest sibling's child

229 (children)?

230 Continued for all siblings
